# Supplementary material for: 3D hierarchical MnO2 nanorod/welded Ag-nanowire-network composites for high-performance supercapacitor electrodes
Source: Royal Society of Chemistry journal article supplement (doi:10.1039/c6cc03768b), 2016-01-01
Supplement: c6cc03768b1.pdf [file c6cc03768b1.pdf]

**Electronic Supplementary Material (ESI) for ChemComm.**  
**This journal is © The Royal Society of Chemistry 2016**

## **Supplementary Information**

### **3D hierarchical MnO<sub>2</sub> nanorods/welded Ag-nanowire-network composites for high-performance supercapacitor electrodes**

Zhensong Qiao<sup>a</sup>, Xiaopeng Yang<sup>a\*</sup>, Shuhua Yang<sup>a</sup>, Liqiang Zhang<sup>b</sup> and Bingqiang Cao<sup>a\*</sup>

<sup>a</sup> Laboratory of Inorganic Energy and Environment Materials, School of Material Science and Engineering, University of Jinan, Jinan 250022, Shandong, China.

<sup>b</sup> State Key Laboratory of Heavy Oil Processing and Department of Materials Science and Engineering, China University of Petroleum, Beijing 102249, China.

\*To whom correspondence should be addressed; e-mail: mse\_yangxp@ujn.edu.cn

mse\_caobq@ujn.edu.cn

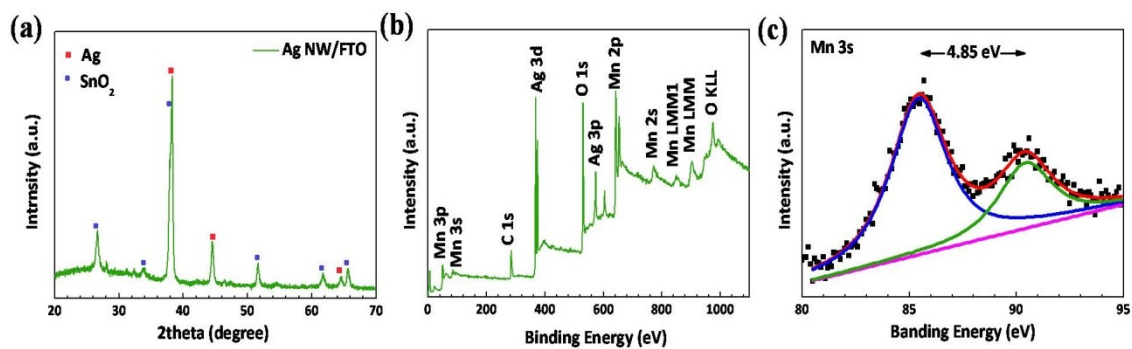

Fig. S1 (a) XRD patterns of the AgNW/FTO. (b) XPS full-survey-scan spectrum of the 3D MN/w-ANN composites, (c) XPS core-level spectra of Mn 3s.

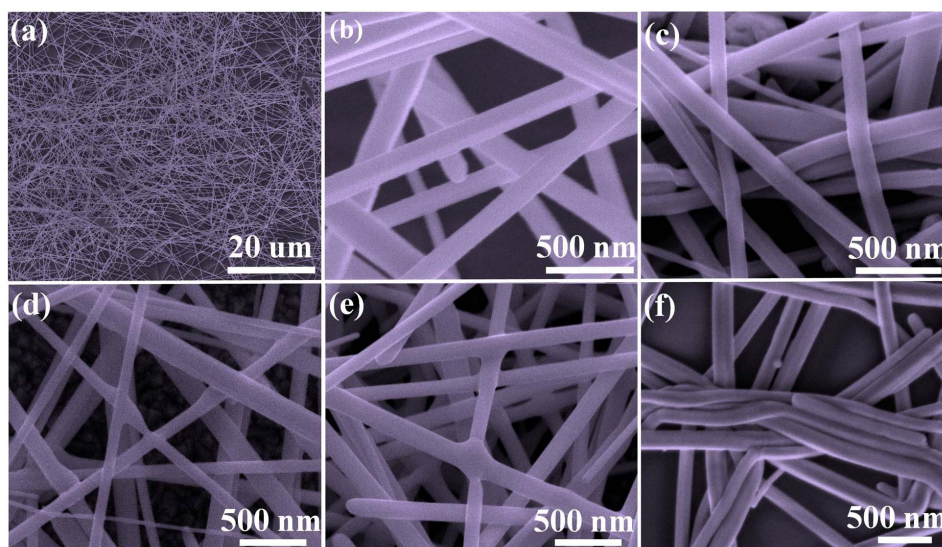

Fig. S2 SEM of AgNW network at different annealing temperature (a) and (b) room temperature; (c) 200 °C; (d) 250 °C; (e) 300 °C; (f) 350 °C.

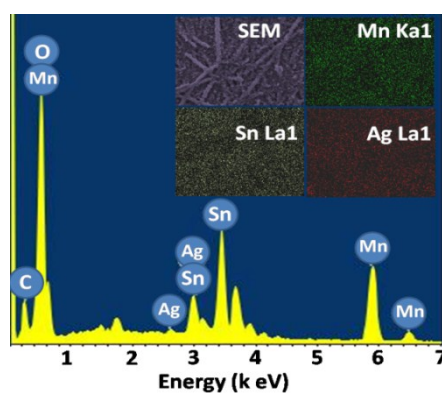

Fig. S3 EDX spectrum showing the elemental composition of the 3D MN/w-ANN composites, the insets show its SEM and elemental mapping of Mn, Sn and Ag.

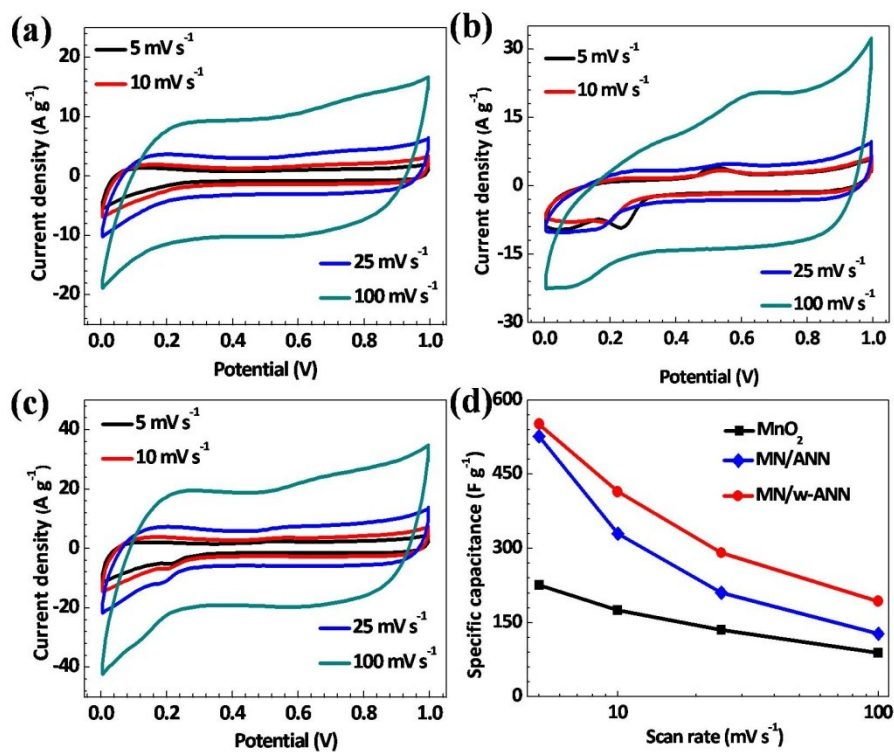

**Fig. S4** CV curves for (a) the bare MnO<sub>2</sub>, (b) the MN/ANN electrode and (c) the 3D MN/w-ANN composite electrode at different scan rates in 0.5 M Na<sub>2</sub>SO<sub>4</sub> aqueous electrolyte; (d) Specific capacitances of the bare MnO<sub>2</sub>, the MN/ ANN and the 3D MN/w-ANN composite electrode.

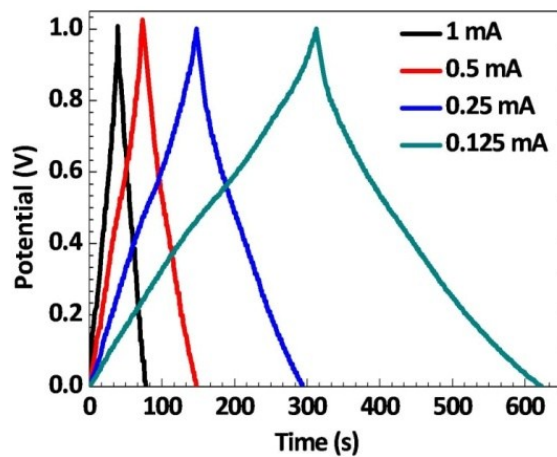

**Fig. S5** GCD curves of the 3D MN/w-ANN composite electrode at different current.

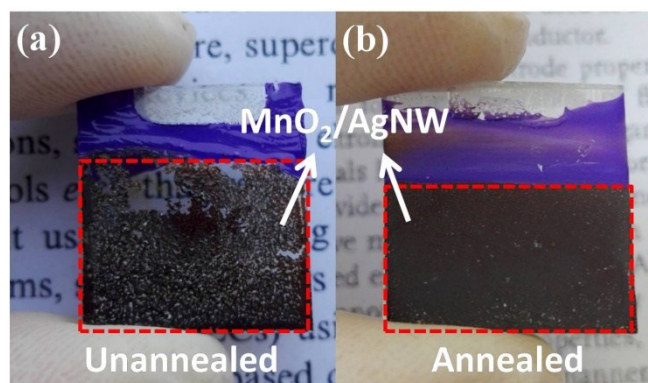

**Fig. S6** Photo images of electrodes after GCD testing (a) the MN/ ANN electrode; (b) the 3D MN/w-ANN composite electrode.

**Table S1.** The mass ratio between MnO<sub>2</sub> and AgNW network in the 3D MN/w-ANN composite electrodes and the corresponding specific capacitance.

|                                           |       |        |        |        |        |        |        |        |
|-------------------------------------------|-------|--------|--------|--------|--------|--------|--------|--------|
| AgNWs spin-coated number                  | 0     | 5      | 10     | 20     | 40     | 60     | 80     | 100    |
| Mass ratio (MnO <sub>2</sub> :AgNW)       | 1 : 0 | 1:0.05 | 1:0.10 | 1:0.19 | 1:0.28 | 1:0.30 | 1:0.40 | 1:0.45 |
| Specific capacitance (F g <sup>-1</sup> ) | 135.1 | 191.7  | 218.5  | 274.3  | 314.8  | 354.1  | 378.3  | 365.4  |

**Table S2.** Comparison of specific capacitance, cycle number and capacitance retention of the reported MnO<sub>2</sub> electrodes and the present work.

| Materials                               | Electrolyte                           | Testing condition           | Specific capacitance    | Cycle number | Capacitance retention | Ref. |
|-----------------------------------------|---------------------------------------|-----------------------------|-------------------------|--------------|-----------------------|------|
| Mesoporous MnO <sub>2</sub>             | 1 M Na <sub>2</sub> SO <sub>4</sub>   | <b>0.4 A g<sup>-1</sup></b> | 229 F g <sup>-1</sup>   | 2000         | 97.3%                 | 1    |
| MnO <sub>2</sub> nanowires              | 0.1 M Na <sub>2</sub> SO <sub>4</sub> | 77 mA g <sup>-1</sup>       | 167.5 F g <sup>-1</sup> | 3000         | 88%                   | 2    |
| MnO <sub>2</sub> nanorod arrays         | 0.5 M Na <sub>2</sub> SO <sub>4</sub> | <b>3 A g<sup>-1</sup></b>   | 485.2 F g <sup>-1</sup> | 1500         | <b>123 %</b>          | 3    |
| Free-standing MnO <sub>2</sub> nanorods | 0.5 M Na <sub>2</sub> SO <sub>4</sub> | <b>3 A g<sup>-1</sup></b>   | 355.7 F g <sup>-1</sup> | 1500         | <b>115%</b>           | 3    |
| MnO <sub>2</sub> /CNTs                  | 1 M Na <sub>2</sub> SO <sub>4</sub>   | <b>1 A g<sup>-1</sup></b>   | 201 F g <sup>-1</sup>   | 10000        | 100%                  | 4    |
| MnO <sub>2</sub> @polyaniline           | 1 M Na <sub>2</sub> SO <sub>4</sub>   | <b>1 A g<sup>-1</sup></b>   | 437 F g <sup>-1</sup>   | 3000         | 100%                  | 5    |
| ZnO@MnO <sub>2</sub> core-shell arrays  | 1 M Na <sub>2</sub> SO <sub>4</sub>   | 0.5 A g <sup>-1</sup>       | 423.5 F g <sup>-1</sup> | 3000         | 92%                   | 6    |
| Ag NP/MnO <sub>2</sub>                  | 1 M Na <sub>2</sub> SO <sub>4</sub>   | 10 mV s <sup>-1</sup>       | 272 F g <sup>-1</sup>   | —            | —                     | 7    |
| Ag/MnO <sub>2</sub> /RGO                | 3 M KOH                               | 5 mV s <sup>-1</sup>        | 126.2 F g <sup>-1</sup> | 1000         | <b>134%</b>           | 8    |
| Ag/PANI/MnO <sub>2</sub>                | 1 M Na <sub>2</sub> SO <sub>4</sub>   | <b>0.1 A g<sup>-1</sup></b> | 518 F g <sup>-1</sup>   | 1600         | 88.4%                 | 9    |

|                                      |                                           |                           |                               |             |             |                 |
|--------------------------------------|-------------------------------------------|---------------------------|-------------------------------|-------------|-------------|-----------------|
| Ag-doped MnO <sub>2</sub>            | 0.5 M Na <sub>2</sub> SO <sub>4</sub>     | 2 mV s <sup>-1</sup>      | 770 F g <sup>-1</sup>         | —           | —           | 10              |
| Hair-like Ag/MnO <sub>x</sub>        | 1 M Na <sub>2</sub> SO <sub>4</sub>       | 2 A g <sup>-1</sup>       | 237 F g <sup>-1</sup>         | 800         | 78%         | 11              |
| Ag/MnO <sub>2</sub> hybrid electrode | 1 M Na <sub>2</sub> SO <sub>4</sub>       | 10 mV s <sup>-1</sup>     | 293 F g <sup>-1</sup>         | 5000        | 92.5%       | 12              |
| <b>MnO<sub>2</sub>/a-AgNW</b>        | <b>0.5 M Na<sub>2</sub>SO<sub>4</sub></b> | <b>6 A g<sup>-1</sup></b> | <b>663.4 F g<sup>-1</sup></b> | <b>7000</b> | <b>157%</b> | <b>The work</b> |

## Loading mass calculation of AgNW network and MnO<sub>2</sub>

The AgNW/FTO substrates are obtained by spin-coating AgNW ink on FTO conducting glass. Firstly, we weight 20 pieces of cleaned FTO conducting glass with cut into 2\*2 cm<sup>2</sup>, and the mass is denoted as  $m_1$ . Then, AgNWs ink is spun on the surface of total FTO substrates at a 3000 rpm rotation speed for 5 times, respectively. Finally, the total AgNW/FTO substrates are weighted, and their loading mass is  $m_2$ . Thus, the mass  $m^*$  of each AgNW network layer on FTO can be calculated by equation (1):

$$m^* = \frac{m_2 - m_1}{20} \quad (1)$$

Loading mass of the other AgNW network layer by different spin-coating number can be obtained using the above method.

The electrochemical deposition process was carried out via the potentiostatic method under 1.0 V. And assuming 100% current efficiency via the reaction, shown as follows:

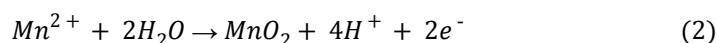

Thus, the loading mass of electrodeposited MnO<sub>2</sub> is calculated using below equation:

$$m^* = \frac{(\int Idt)M}{2eN_A} \quad (3)$$

where  $I$  is the current,  $t$  is the electrochemical deposition time,  $m$  is the electrochemical deposition mass of MnO<sub>2</sub> on the AgNW/FTO substrate,  $e$  is the electron charge,  $N_A$  is the Avogadro's number, and  $M$  is molar mass of MnO<sub>2</sub> (86.9 g mol<sup>-1</sup>).<sup>12</sup> Therefore, the loading mass of MnO<sub>2</sub> on the AgNW/FTO substrate is around 0.30 mg.

## Specific capacitance calculation of MnO<sub>2</sub>/a-AgNW electrode

Specific capacitance ( $C_{sp}$ ) is the capacitance per unit mass for one electrode. In Cyclic voltammetry

(CV) measurements, the  $C_{sp}$  is calculated from:

$$C_{sp} = \frac{\int I dV}{2m\Delta V v_0} \quad (4)$$

where  $I$  is the current,  $V$  is the voltage,  $\Delta V$  is the voltage window,  $v_0$  is the scan rate, and  $m$  is the loading mass of  $MnO_2$ .

In galvanostatic charge/discharge (GCD) measurements, the  $C_{sp}$  is calculated from:

$$C_{sp} = \frac{I \Delta t}{m\Delta V} \quad (5)$$

where  $I$  is the discharge current,  $\Delta t$  is the discharge time, the  $\Delta V$  is the voltage difference of discharge, and  $m$  is the loading mass of  $MnO_2$ .<sup>13</sup>

## References

1. S. Sun, P. Wang, Q. Wu, S. Wang and S. Fang, *Mater. Lett.*, 2014, **137**, 206.
2. S. L. Chou, J. Z. Wang, S. Y. Chew, H. K. Liu and S. X. Dou, *Electrochem. Commun.*, 2008, **10**, 1724.
3. X. Lu, D. Zheng, T. Zhai, Z. Liu, Y. Huang, S. Xie and Y. Tong, *Energy Environ. Sci.*, 2011, **4**, 2915.
4. L. Li, Z. A. Hu, N. An, Y. Y. Yang, Z. M. Li and H. Y. Wu, *J. Phys. Chem. C*, 2014, **118**, 22865.
5. M. Yang, S. B. Hong and B. G. Choi, *Phys. Chem. Chem. Phys.*, 2015, **17**, 29874.
6. M. Huang, F. Li, X. L. Zhao, D. Luo, X. Q. You, Y. X. Zhang and G. Li, *Electrochimica Acta*, 2015, **152**, 172.
7. G. N. Zhang, L. Zheng, M. Zhang, S. H. Guo, Z. H. Liu, Z. Yang and Z. Wang, *Energy & Fuels*, 2012, **26**, 618.
8. L. Ma, X. Shen, Z. Ji, G. Zhu and H. Zhou, *Chemical Engineering Journal*, 2014, **252**, 95.
9. C. Pan, Y. H. Lv, H. M. Gong, Q. K. Jiang, S. Miao and J. Y. Liu, *RSC Adv.*, 2016, **6**, 17415.
10. Y. Wang and I. Zhitomirsky, *Mater. Lett.*, 2011, **65**, 1759.
11. Y. H. Li, Z. Y. Wang and Y. F. Zhang, *J. Alloys and Compounds*, 2015, **644**, 47.
12. H. Xia, C. Hong, X. Shi, B. Li, G. Yuan, Q. Yao and J. Xie, *J. Mater. Chem. A*, 2015, **3**, 1216.
13. Z. Yu, B. Duong, D. Abbitt and J. Thomas, *Adv. Mater.*, 2013, **25**, 3302.
